# Supplementary material for: Biomarker-guided translation of brain imaging into disease pathway models
Source: PubMed Central journal article supplement — Sci Rep. 2013 Nov 29;3:3375. doi: 10.1038/srep03375 (PMC3843161; doi:10.1038/srep03375), 2013-11-29
Supplement: srep03375-s1.pdf [file srep03375-s1.pdf]

# Biomarker-guided translation of brain imaging into disease pathway models

Erfan Younesi<sup>1,2,\*</sup>, Martin Hofmann-Apitius<sup>1,2</sup>

June 23, 2013

1. Department of Bioinformatics, Fraunhofer Institute for Algorithms and Scientific Computing (SCAI),  
Schloss Birlinghoven, Sankt Augustin 53754, Germany
2. Rheinische Friedrich-Wilhelms-Universität Bonn, Bonn-Aachen International Center for IT, Dahlmannstr. 2,  
Bonn 53113, Germany

\* Corresponding Author: Erfan Younesi, [erfan.younesi@scai.fraunhofer.de](mailto:erfan.younesi@scai.fraunhofer.de)

**Supplementary Table 1. Imaging information extracted from the literature and manually corrected and categorized into disease stages for Alzheimer's disease**

| <b>Disease stage</b> | <b>Imaging technique</b> | <b>Regions affected (PMIDs)</b>                                                                                                                                                                                                                                                                         |
|----------------------|--------------------------|---------------------------------------------------------------------------------------------------------------------------------------------------------------------------------------------------------------------------------------------------------------------------------------------------------|
| Severe AD            | DTI                      | <b>Cingulum</b> (23011219, 18219201)<br><b>Thalamus</b> (20157252, 17444598)<br><b>Hippocampus</b> (17444598)<br><b>Temporal lobe</b> (20157252, 19406355)                                                                                                                                              |
|                      | fMRI                     | <b>Cerebral cortex</b> (20656843, 18945600)<br><b>Hippocampus</b> (22766738, 20656843)<br><b>Temporal lobe</b> (19747163, 18400793, 20656843)                                                                                                                                                           |
|                      | MRI                      | <b>Temporal lobe</b> (23561509, 9341577, 22717328, 18765650, 11511703, 16797786, 17533169, 7480379, 8648331, 8059176, 19228848, 10077306, 15374058)<br><b>Hippocampus</b> (22414571, 8986328, 2103656, 22717328, 11511703, 8239283, 20656843, 16797786, 8648331, 10662960, 8059176, 11160463, 17178234) |
|                      | PET                      | <b>Posterior cingulate</b> (21971455, 11960900, 10843517, 16407119)<br><b>Temporal lobe</b> (21853308, 21971455, 9339671, 11511703, 2674513, 3512063, 12812674)                                                                                                                                         |
| Moderate AD          | DTI                      | -                                                                                                                                                                                                                                                                                                       |
|                      | fMRI                     | -                                                                                                                                                                                                                                                                                                       |
|                      | MRI                      | <b>Cingulate cortex</b> (20872914)                                                                                                                                                                                                                                                                      |
|                      | PET                      | <b>Prefrontal cortex</b> (19617327)<br><b>Posterior cingulate</b> (12593416)                                                                                                                                                                                                                            |
| Early (mild) AD/MCI  | DTI                      | <b>Corpus callosum</b> (22545143, 21182970, 22256149, 20368633, 20164572, 20847446)<br><b>Temporal lobe</b> (20615058, 16801648, 17905894)                                                                                                                                                              |
|                      | fMRI                     | <b>Temporal lobe</b> (16842102, 22815064, 22216234, 16997428, 17021177, 20656843, 18928090, 16087905)<br><b>Precuneus cortex</b> (15954139, 22456451)                                                                                                                                                   |

|  |     |                                                                                                                                                                                                                                                                                                                                                                                                                                                                                                                                                                                                                                                                                                                                                                                                                                                                                                                                        |
|--|-----|----------------------------------------------------------------------------------------------------------------------------------------------------------------------------------------------------------------------------------------------------------------------------------------------------------------------------------------------------------------------------------------------------------------------------------------------------------------------------------------------------------------------------------------------------------------------------------------------------------------------------------------------------------------------------------------------------------------------------------------------------------------------------------------------------------------------------------------------------------------------------------------------------------------------------------------|
|  | MRI | <p><b>Temporal lobe/hippocampus</b> (22766164 , 22354229, 23071546, 22986782, 22994551, 22922563, 20443979, 21264200, 18021379, 16321457, 14663029, 12438466, 9920358, 16286546, 16396228, 12397142, 21116054, 21808873, 20938031, 20705437, 9305341, 20847406, 19901171, 12215875, 11511703, 20541374, 18809228, 7477910, 22300935, 21437929, 16511646, 10911878, 9219745, 8648331, 20143386, 19259976, 17399959, 17434756, 15883311, 12849541, 11388566, 10802781, 19280688, 17960142, 11971085, 11930016, 15734360, 15123335, 12094908, 23303849, 22308496, 22759884, 12595205, 22095921, 19835661, 16125145, 11942499, 10563634, 20375138, 17936858, 9442345, 19698521, 8624070, 8108005, 1779721, 8788077, 22078174)</p> <p><b>Entorhinal cortex</b> (22986782, 21494034, 19073399, 17923632, 7991745, 18809228, 15925102, 22300935, 10911878, 15883311, 12849541, 10802781, 16470518, 11971085, 15123335, 22815064, 9562498)</p> |
|  | PET | <p><b>Temporal lobe</b> (23179062, 18325543, 17475957, 16300967, 11511703, 15800784, 9219745, 15747152, 3512063, 22592018, 10559570)</p> <p><b>Precuneus cortex</b> (22926714, 19073399, 12593416, 20430977, 21700583, 19412465, 18021379, 18191617, 23112868, 16709580, 15616176)</p>                                                                                                                                                                                                                                                                                                                                                                                                                                                                                                                                                                                                                                                 |

**Supplementary Table 2. List of potential Alzheimer's biomarkers that were retrieved and extracted from the PubMed abstracts and mapped onto the temporal lobe model**

| <b>Potential biomarker</b> | <b>Biomarker evidence in the literature</b>                                                                                               | <b>Reference</b>                                                                      |
|----------------------------|-------------------------------------------------------------------------------------------------------------------------------------------|---------------------------------------------------------------------------------------|
| CFLAR                      | Decreased expression in AD brains                                                                                                         | PMID: 11178964<br>PMID: 12608703<br>PMID: 12885274                                    |
| PSEN1                      | Decreased expression in AD hippocampus                                                                                                    | PMID: 9067452<br>PMID: 10754226                                                       |
| PSEN2                      | Reduced expression in AD neurons                                                                                                          | PMID: 8918895<br>PMID: 9067452<br>PMID: 10891593                                      |
| FASLG                      | Increased activity in AD hippocampus                                                                                                      | PMID: 12742739<br>PMID: 12738769<br>PMID: 11113303                                    |
| RELA                       | Significant increase in the immunoreactivities of NF- $\kappa$ Bp65 in the hippocampus and the temporal and frontal cortices of AD brains | PMID: 8905182<br>PMID: 9406869<br>PMID: 22177240<br>PMID: 9775392<br>PMID: 21592054   |
| FAS                        | Increased expression in AD hippocampus; increased serum levels; increased expression in T cells of AD patients                            | PMID: 9395128<br>PMID: 16736246<br>PMID: 12391607<br>PMID: 11893840<br>PMID: 15538542 |
| CASP6                      | Increased expression in AD temporal cortex                                                                                                | PMID: 15277226<br>PMID: 23020846                                                      |
| CASP8                      | Significant increase in the enzymatic activity                                                                                            | PMID: 11741396<br>PMID: 15473998<br>PMID: 12183349<br>PMID: 16772874                  |
| CASP3                      | Increase in active caspase-3 expression levels                                                                                            | PMID: 10550301<br>PMID: 18818379<br>PMID: 19774677                                    |

|       |                                               |                                                                                                       |
|-------|-----------------------------------------------|-------------------------------------------------------------------------------------------------------|
|       |                                               | PMID: 10079193<br>PMID: 23546897<br>PMID: 23181759                                                    |
| PARP1 | Enhanced PARP activity in Alzheimer's disease | PMID: 10071053<br>PMID: 12738769                                                                      |
| BCL2  | Marked expression in AD hippocampus           | PMID: 17967740<br>PMID: 10406024<br>PMID: 11311497<br>PMID: 9560019<br>PMID: 8730800<br>PMID: 8593592 |
| DAXX  | Increased expression in AD hippocampus        | PMID: 12391607<br>PMID: 15176485                                                                      |
